# Supplementary material for: Fast synthesis of copper nanoclusters through the use of hydrogen peroxide additive and their application for the fluorescence detection of Hg2+ in water samples
Source: Royal Society of Chemistry journal article supplement (doi:10.1039/c5nj00831j), 2015-01-01
Supplement: c5nj00831j1.pdf [file c5nj00831j1.pdf]

## Supplementary data

# Fast synthesis of copper nanoclusters through the use of hydrogen peroxide additive and the application for fluorescent detection of $\text{Hg}^{2+}$ in water samples

Liao Xiaoqing,<sup>a</sup> Li Ruiyi,<sup>a</sup> Li Zaijun\*<sup>a</sup>, Sun Xiulan,<sup>b</sup> Wang Zhouping<sup>b</sup> and Liu Junkang<sup>c</sup>

<sup>a</sup> School of Chemical and Material Engineering, Jiangnan University, Wuxi 214122, China

<sup>b</sup> School of Food Science and Technology, Jiangnan University, Wuxi 214122, China

<sup>c</sup> Key Laboratory of Food Colloids and Biotechnology, Ministry of Education, Wuxi 214122, China

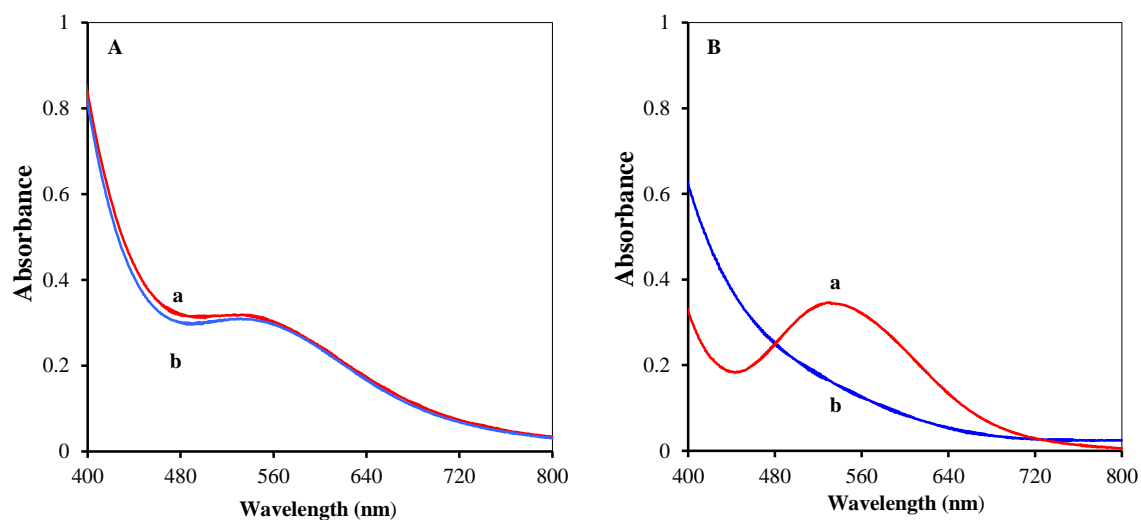

**Fig.s1** The absorption spectra of the CuNCs prepared by the proposed method (A) and the conventional method (B) before (a) and after (b) 0.5 ml of the  $\text{Na}_2\text{S}$  solution (0.1 M)

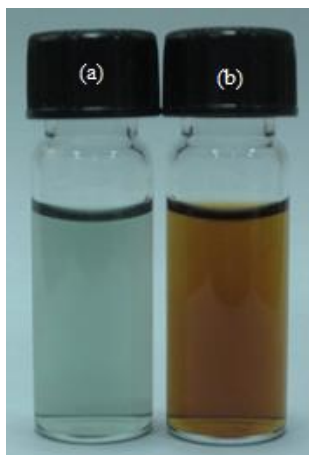

**Fig.s2** Optical photographs of the mixture of the CuNCs prepared by the proposed method, 2 mM of free  $\text{Cu}^{2+}$  and 20 mM of  $\text{H}_2\text{O}_2$  before (a) and after (b) added 0.5 ml of the  $\text{Na}_2\text{S}$  solution (0.1M).

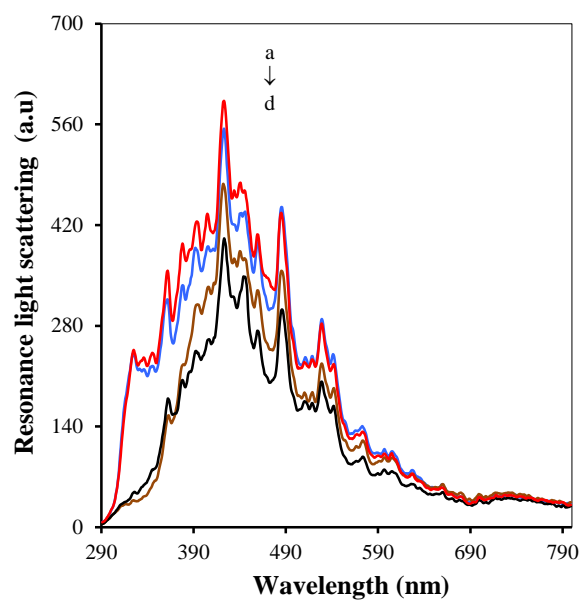

**Fig.s3** Resonance light scattering spectra of BSA- $\text{H}_2\text{O}_2$  (a), BSA (b), BSA-Cu (c) and BSA-Cu- $\text{H}_2\text{O}_2$  (d).

Conditions: pH 12, BSA:  $5 \text{ mg mL}^{-1}$ ,  $\text{H}_2\text{O}_2$ : 0.04 M,  $\text{Cu}^{2+}$ : 0.2 mM, and  $\lambda_{\text{ex}} = \lambda_{\text{em}}$  (290-800nm)

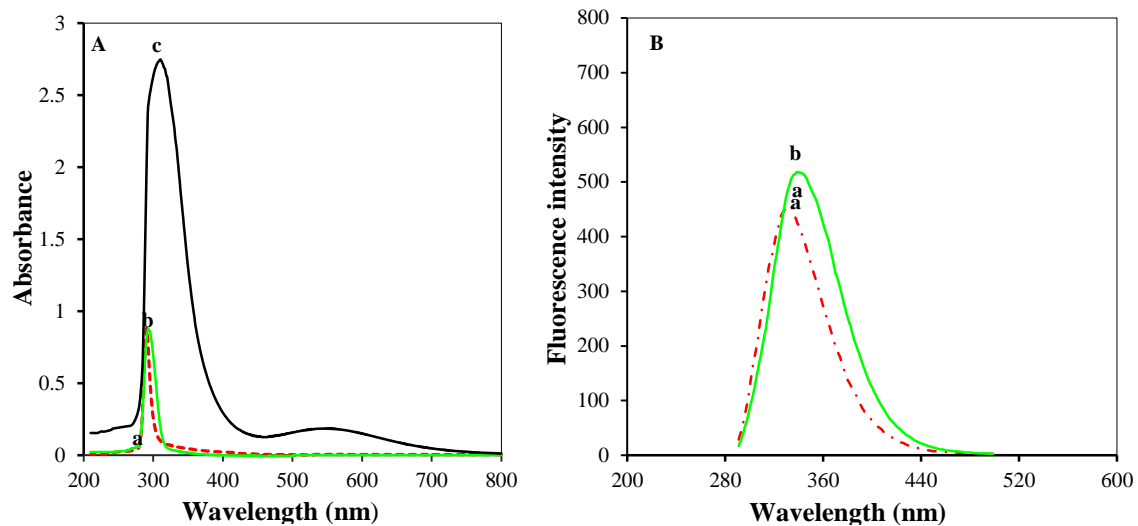

**Fig.s4** The ultraviolet-visible absorption spectra (A) and fluorescence spectra (B) of BSA before (a) and after (b)  $H_2O_2$  and the CuNCs solution

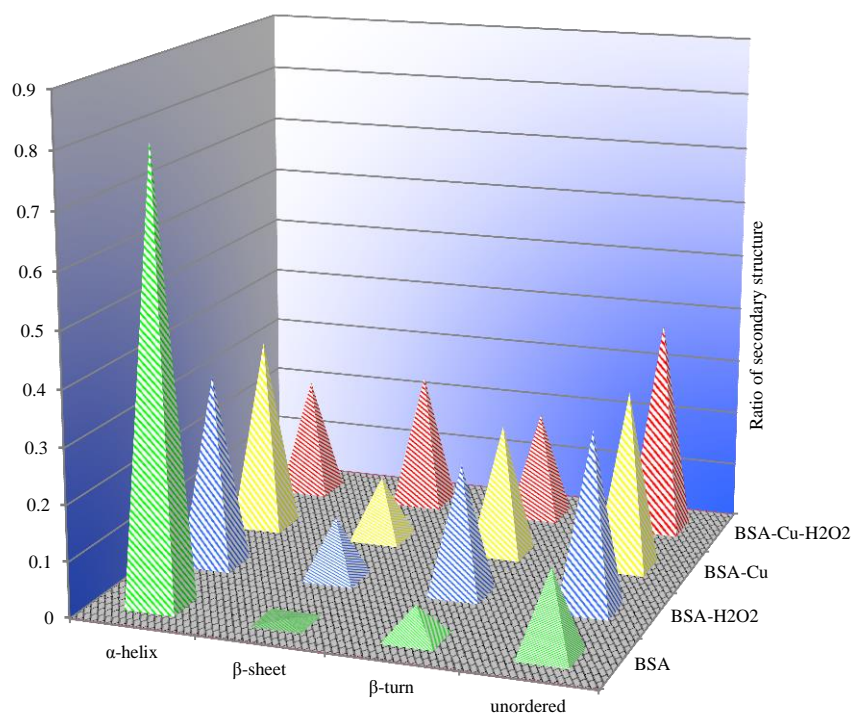

**Fig.s5** The secondary structures of BSA, BSA- $H_2O_2$ , BSA-Cu and BSA-Cu- $H_2O_2$ . Conditions: pH 12, BSA: 5  $mg\ mL^{-1}$ ,  $H_2O_2$ : 0.04 M, and  $Cu^{2+}$ : 0.2 mM

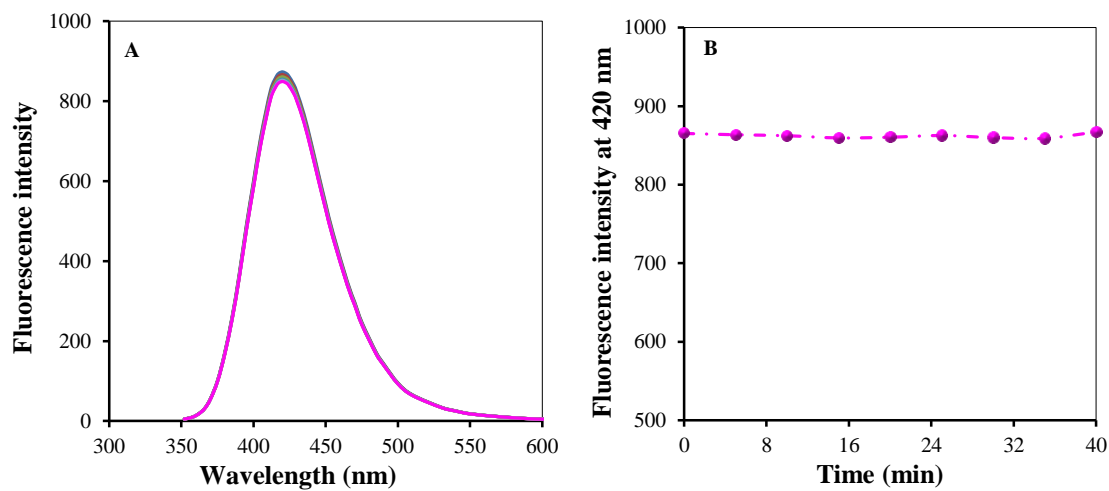

**Fig.s6A:** Fluorescence spectrum of the CuNCs prepared by the proposed method with different irradiating time using a 350 W of Xe lampe. B: Relationship of the fluorecence intensity at 420 nm with light irradiating time.

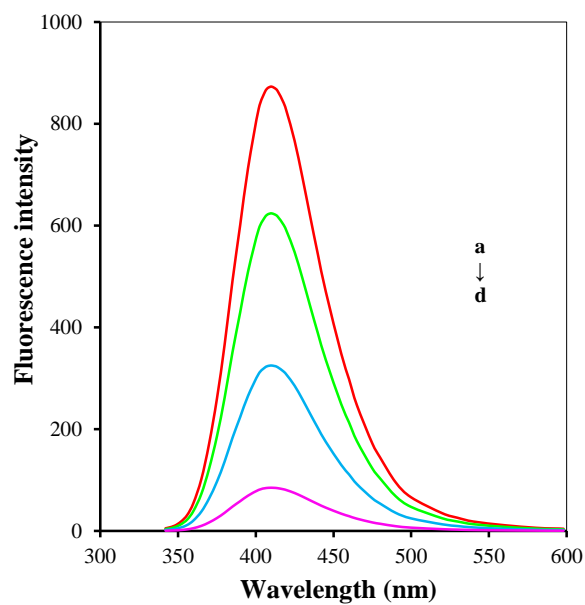

**Fig.s7** The fluorescence spectra of the CuNCs solution prepared by the proposed method after added 0.0, 0.0001, 0.0025 and 0.005 M of Cu<sup>2+</sup> (from a to d)
